# Supplementary material for: Large enhancement of electrochemical biomass oxidation by optimizing the competitive adsorption of HMF and OH− on doped CoOx
Source: Royal Society of Chemistry journal article supplement (doi:10.1039/d4qi00519h), 2024-01-01
Supplement: d4qi00519h1.pdf [file d4qi00519h1.pdf]

## Supporting Information for

# Large Enhancement of Electrochemical Biomass Oxidation by Optimizing the Competitive Adsorption of HMF and OH<sup>-</sup> Over Doping of CoO<sub>x</sub>

Tianqi Nie,<sup>a,b</sup> Guihao Liu,<sup>a</sup> Ziheng Song,<sup>a</sup> Tianyang Shen,<sup>a</sup> Xiaoliang Sun,<sup>a</sup> Tianrui

Yu,<sup>a</sup> Sha Bai,<sup>a</sup> Lirong Zheng,<sup>c</sup> and Yu-Fei Song<sup>\*ab</sup>

<sup>a</sup>State Key Laboratory of Chemical Resource Engineering, Beijing University of Chemical Technology, Beijing 100029, P. R. China. \*E-mail: songyf@mail.buct.edu.cn; Fax/Tel: +86 10-64431832.

<sup>b</sup>Quzhou Institute for Innovation in Resource Chemical Engineering, Quzhou, Zhejiang Province, 324000 P. R. China.

<sup>c</sup>Beijing Synchrotron Radiation Facility, Institute of High Energy Physics, Chinese Academy of Sciences, Beijing 100049, P. R. China.

## **Section 1. Experimental Detail**

## **Section 2. Experimental Detail Supporting Figures and Tables**

**Figure S1.** HR-TEM images of  $\text{CoM}(\text{OH})_x$  (M=Mn, Fe, Co, Ni, Cu and Zn).

**Figure S2.** XRD patterns of  $\text{CoM}(\text{OH})_x$  (M=Mn, Fe, Co, Ni, Cu and Zn)..

**Figure S3.** HR-TEM images of  $\text{CoCuO}_x$ .

**Figure S4.** HR-TEM images of  $\text{CoMO}_x$  (M=Mn, Fe, Co, Ni, Cu and Zn).

**Figure S5.** XRD patterns of  $\text{CoMO}_x$  (M=Mn, Fe, Co, Ni, Cu and Zn).

**Figure S6.** The XPS spectra of  $\text{CoMO}_x$  (M=Mn, Fe, Co, Ni, Cu and Zn)..

**Figure S7.** The Co 2p XPS spectra of  $\text{CoMO}_x$  (M=Mn, Fe, Co, Ni, Cu and Zn).

**Figure S8.** Calibration of the saturated Ag/AgCl electrode converted to reverse hydrogen electrode (RHE).

**Figure S9.** The tafel data of  $\text{CoMO}_x$  (M=Mn, Fe, Co, Ni, Cu and Zn) for HMFOR.

**Figure S10.** Nyquist plots of  $\text{CoMO}_x$  (M=Mn, Fe, Co, Ni, Cu and Zn) for HMFOR.

**Figure S11.** The LSV plots of HMFOR on  $\text{CoMO}_x$  (M=Mn, Fe, Co, Ni, Cu and Zn).

**Figure S12.** HPLC standard curve measurements of a) FDCA; b) HMFCa; c) FFCA; d) HMF; e) DFF; f) The HPLC traces of the products at different concentrations.

**Figure S13.** Structural characterization of  $\text{CoCuO}_x$  after HMFOR. a) HR-TEM of  $\text{CoCuO}_x$  after HMFOR; b) XRD spectra; c) The Co 2p XPS spectra.

**Figure S14.** Current densities and charge-time during the HMFOR

**Figure S15.**  $C_{dl}$  of  $\text{CoMO}_x$  (M=Mn, Fe, Co, Ni, Cu and Zn) measured by CVs in 1 M KOH with scan rate of 10 to 50  $\text{mV s}^{-1}$ .

**Figure S16.** Double-layer charging current plotted against the CV scan rate for  $\text{CoMO}_x$

(M=Mn, Fe, Co, Ni, Cu and Zn).

**Figure S17.** LSV curves with normalization by ECSA of CoMO<sub>x</sub> in 1 M KOH and 50 mM HMF.

**Figure S18.** a) Bode plots and b) Nyquist plots of CoCuO<sub>x</sub> for OER in different potentials; c) Bode plots and d) Nyquist plots of CoO<sub>x</sub> for OER in different potentials.

**Figure S19.** a) Bode plots and b) Nyquist plots of CoO<sub>x</sub> for HMFOR in different potentials.

**Figure S20.** EPR spectra of CoCuO<sub>x</sub> before and after voltage application in 1 M KOH and 50 mM HMF.

**Figure S21.** Co K-edge EXAFS fitting results for CoMO<sub>x</sub> (M=Mn, Fe, Co, Ni, Cu and Zn) (k-space).

**Figure S22.** Co K-edge EXAFS fitting results for CoMO<sub>x</sub> (M=Mn, Fe, Co, Ni, Cu and Zn) (R-space).

**Table S1.** ICP quantitative analysis of CoO<sub>x</sub> doped with different metal elements.

**Table S2.** HMFOR performance of CoCuO<sub>x</sub> and other reported catalysts.

**Table S3.** The resistance of each component for CoMO<sub>x</sub> (M=Mn, Fe, Co, Ni, Cu and Zn) in 1 M KOH and 50 mM HMF.

**Table S4.** The resistance of each component for CoCuO<sub>x</sub> in 1 M KOH.

**Table S5.** The resistance of each component for CoCuO<sub>x</sub> in 1 M KOH with 50 mM HMF.

**Table S6.** The resistance of each component for CoO<sub>x</sub> in 1 M KOH.

**Table S7.** The resistance of each component for CoO<sub>x</sub> in 1 M KOH with 50 mM HMF.

**Table S8.** Co K-edge EXAFS fitting results for CoMO<sub>x</sub> (M=Mn, Fe, Co, Ni, Cu and Zn).

**Reference**

## Section 1. Experimental Detail

**Materials.**  $\text{Co}(\text{NO}_3)_2 \cdot 6\text{H}_2\text{O}$  (99%),  $\text{Mn}(\text{NO}_3)_2 \cdot 4\text{H}_2\text{O}$  (99%),  $\text{Fe}(\text{NO}_3)_3 \cdot 9\text{H}_2\text{O}$  (99%),  $\text{Ni}(\text{NO}_3)_2 \cdot 6\text{H}_2\text{O}$  (99%),  $\text{Cu}(\text{NO}_3)_2 \cdot 3\text{H}_2\text{O}$  (99%),  $\text{Zn}(\text{NO}_3)_2 \cdot 6\text{H}_2\text{O}$  (99%),  $\text{NaOH}$  (>98%) and 5-hydroxymethylfurfural (HMF) were all obtained from Energy Chemical and were used directly without any further purification.

**Synthesis of  $\text{CoM}(\text{OH})_x$  ( $\text{M}=\text{Mn, Fe, Co, Ni, Cu and Zn}$ ).** The  $\text{CoM}(\text{OH})_x$  ( $\text{M}=\text{Mn, Fe, Co, Ni, Cu and Zn}$ ) was synthesized using a coprecipitation method according to the reference. A 20.0 ml solution composed 0.75 mmol  $\text{Co}(\text{NO}_3)_2 \cdot 6\text{H}_2\text{O}$  and 0.25 mmol  $\text{M}(\text{NO}_3)_x \cdot y\text{H}_2\text{O}$  ( $\text{Mn}(\text{NO}_3)_2 \cdot 4\text{H}_2\text{O}$ ,  $\text{Fe}(\text{NO}_3)_3 \cdot 9\text{H}_2\text{O}$ ,  $\text{Co}(\text{NO}_3)_2 \cdot 6\text{H}_2\text{O}$ ,  $\text{Ni}(\text{NO}_3)_2 \cdot 6\text{H}_2\text{O}$ ,  $\text{Cu}(\text{NO}_3)_2 \cdot 3\text{H}_2\text{O}$ ,  $\text{Zn}(\text{NO}_3)_2 \cdot 6\text{H}_2\text{O}$ ) was added drop by drop to a three-necked flask with 20 ml deionized water by a peristaltic pump under magnetic stirring at 80 °C. In the meantime, a solution with 0.25 M  $\text{NaOH}$  was added to the system to maintain the pH = 10. The precipitates were collected by centrifugation and washed with deionized water for 3 times, ethanol for once. Then 15 mg catalyst was dispersed in 3ml ethanol with the assistance of ultrasonication to form a homogeneous solution. Then 200  $\mu\text{L}$  of the solution was dropped onto a carbon paper (1cm $\times$ 1cm). Taking the sample loss into consideration, the loading of catalyst can be calculated as 1 mg cm<sup>-2</sup>.

**Synthesis of  $\text{CoMO}_x$  ( $\text{M}=\text{Mn, Fe, Co, Ni, Cu and Zn}$ ).** The  $\text{CoM}(\text{OH})_x$  was electrochemically oxidized at a scan rate of 50 mV s<sup>-1</sup> after forty CV scans.

**Characterization.** Powder X-ray diffraction (XRD) analysis was recorded on a Bruker D8 diffractometer with Cu-K $\alpha$  radiation. High resolution transmission electron microscopy (HRTEM) images were collected on a JEOL JEM-2010 electron

microscope operating at 200 kV. X-ray photoelectron spectroscopy (XPS) measurements were explored with monochromatized Al K exciting X-radiation (PHI Quantera SXM). XAS measurements were collected using a Lytle detector at the 1W1B station in Beijing Synchrotron Radiation Facility (BSRF). FT-EXAFS shell fitting was carried out with Artemis Software.

**Electrochemical measurements.** The electrochemical performances were tested in a three-electrode glass cell by a electrochemical workstation (CHI 760e, CH, Shanghai). A method of preparing a work electrode is used as follow: 15 mg  $\text{CoM}(\text{OH})_x$  was dispersed in 3ml ethanol with the assistance of ultrasonication to form a homogeneous solution. Then 200  $\mu\text{L}$  of the solution was dropped onto a carbon paper ( $1\text{cm} \times 1\text{cm}$ ). A Pt electrode and a Ag/AgCl electrode were used as counter and reference electrode, respectively. In the hydrazine oxidation reaction, the linear sweep voltammetry (LSV) curves were collected at a scan rate of  $5\text{ mV s}^{-1}$  after twenty CV scans. All LSV curves were iR-corrected by using the following formula:  $E_{\text{iR-corrected}} = E - I \times R_s$ .<sup>[1]</sup> The current density differences ( $\Delta j = j_a - j_c$ ) were plotted against scan rates, and the linear slope is twice the double-layer capacitance ( $C_{\text{dl}}$ ). The ECSA can be calculated from the double-layer capacitance ( $C_{\text{dl}}$ ) using the following equation:  $\text{ECSA} = S_{\text{geo}} * C_{\text{dl}} / C_s$ . Wherein,  $C_s$  is specific electrochemical double-layer capacitance and its value in alkaline media is  $0.040\text{ mF cm}^{-2}$ , and the  $S_{\text{geo}}$  represents the geometric surface area of the working electrode.<sup>[2]</sup> Operando electrochemical impedance spectroscopy (EIS) tests were measured over a frequency range from 10-1 to 105 Hz with an AC amplitude.

**Product characterization.** The identification of HMF and corresponding selective oxidation products utilized high-performance liquid chromatography (HPLC, Agilent 1260 Infinity II) equipped with ultraviolet-visible detector and 4.6 mm× 250 mm Agilent 5 HC-C18 column. As for analysis conditions, the wavelength of the UV detector was set to 265 nm, and the mobile phase was methanol and ammonium formate aqueous solution (5 mM, 2:8, flow rate is 0.6 ml min<sup>-1</sup>). Specifically, 50 µL of electrolyte was removed during potentiostatic electrolysis and diluted to 1 ml with ultrapure water. After evenly diluting, 10 µL of the liquid is injected into the HPLC and separated lasts for 12 minutes.

## Section 2. Supporting Figures and Tables

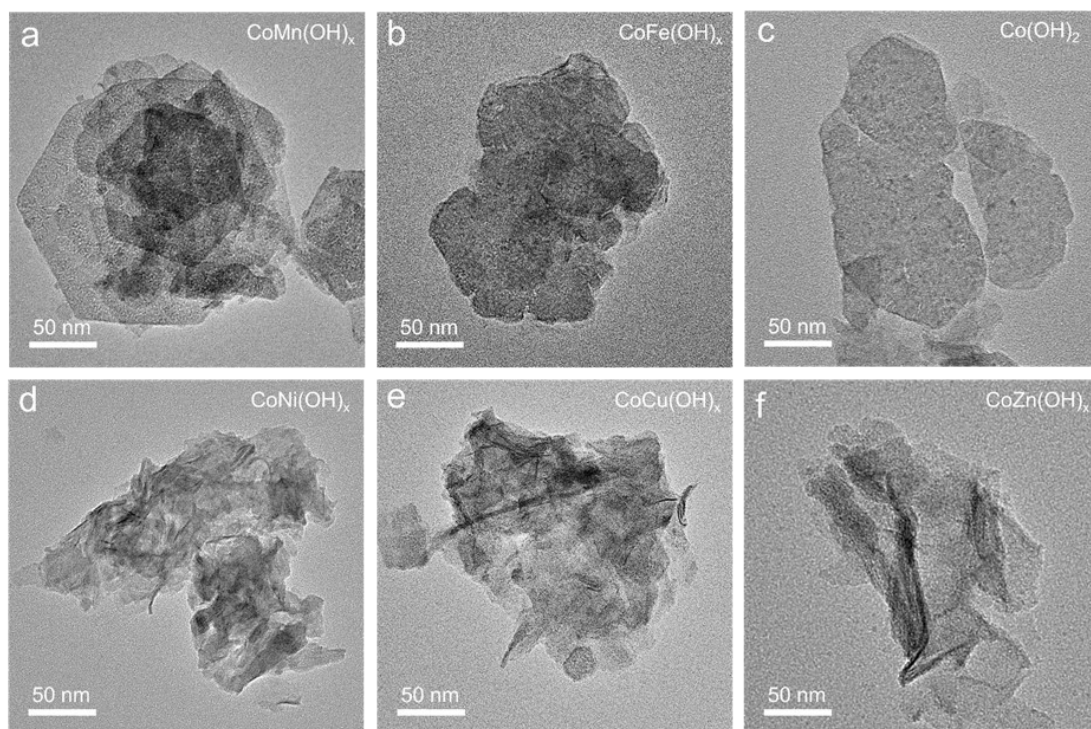

**Figure S1.** HR-TEM images of CoM(OH)<sub>x</sub> (M=Mn, Fe, Co, Ni, Cu and Zn).

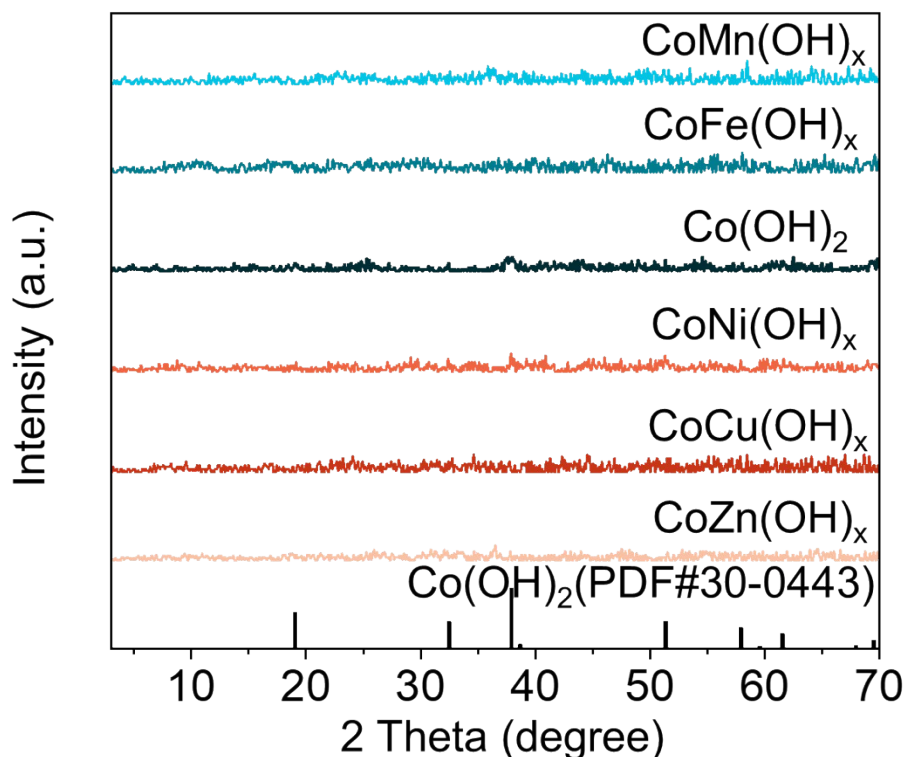

**Figure S2.** XRD patterns of CoM(OH)<sub>x</sub> (M=Mn, Fe, Co, Ni, Cu and Zn).

The obtained CoM(OH)<sub>x</sub> sample from co-precipitation exhibited nearly identical sheet-like structures (**Figure S1**). This suggested that the doping of M had no significant influence on the sheet-like structure of CoM(OH)<sub>x</sub>. The X-ray diffraction (XRD) patterns were collected to further characterize the crystalline structure of CoM(OH)<sub>x</sub>, as shown in **Figure S2**. No significant diffraction peaks were observed, indicating that CoM(OH)<sub>x</sub> had an amorphous structure.<sup>[3]</sup>

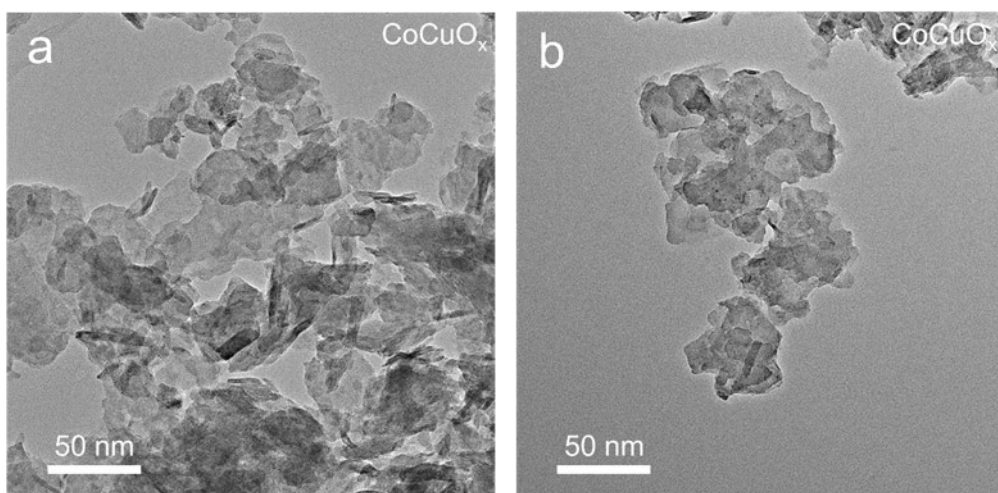

**Figure S3.** HR-TEM images of CoCuO<sub>x</sub>.

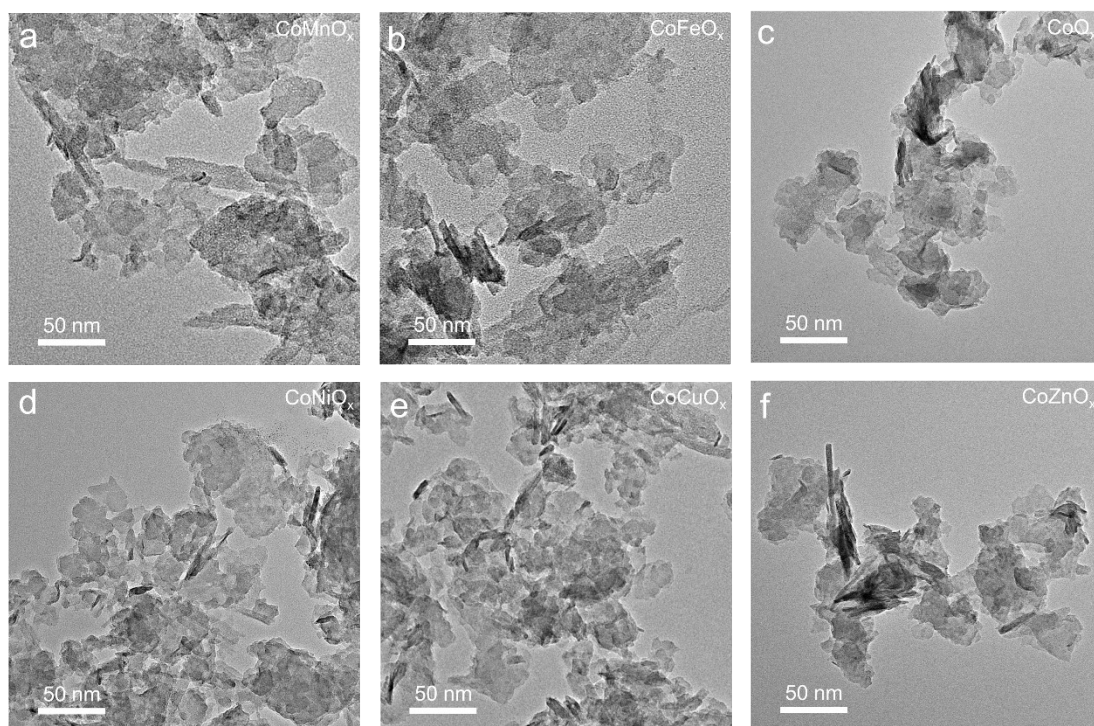

**Figure S4.** HR-TEM images of  $\text{CoMO}_x$  (M=Mn, Fe, Co, Ni, Cu and Zn).

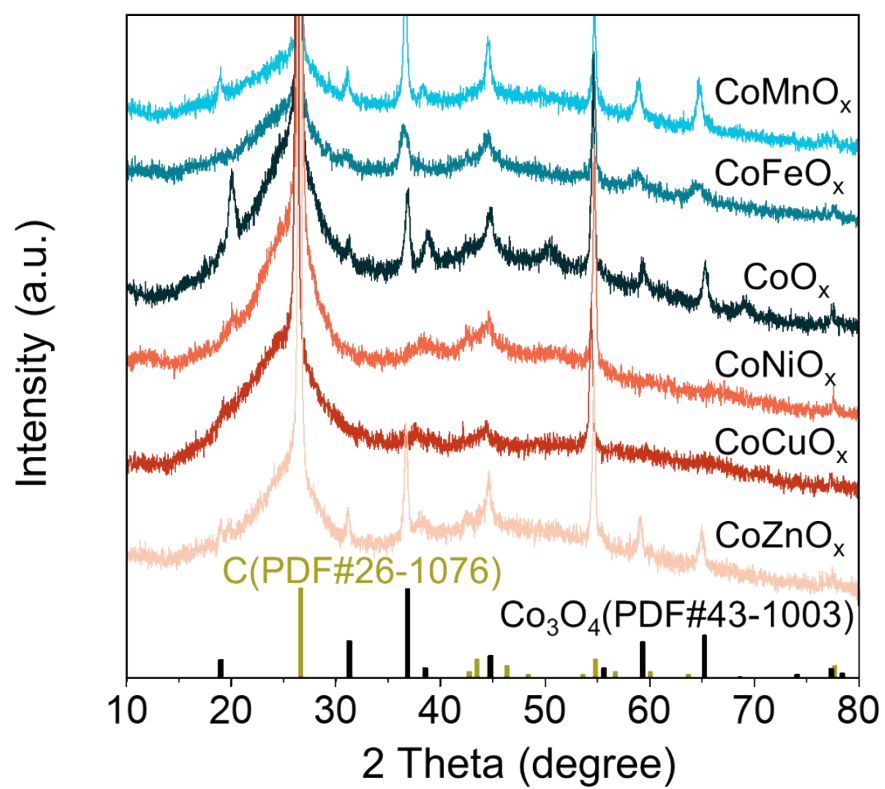

**Figure S5.** XRD patterns of  $\text{CoMO}_x$  (M=Mn, Fe, Co, Ni, Cu and Zn).

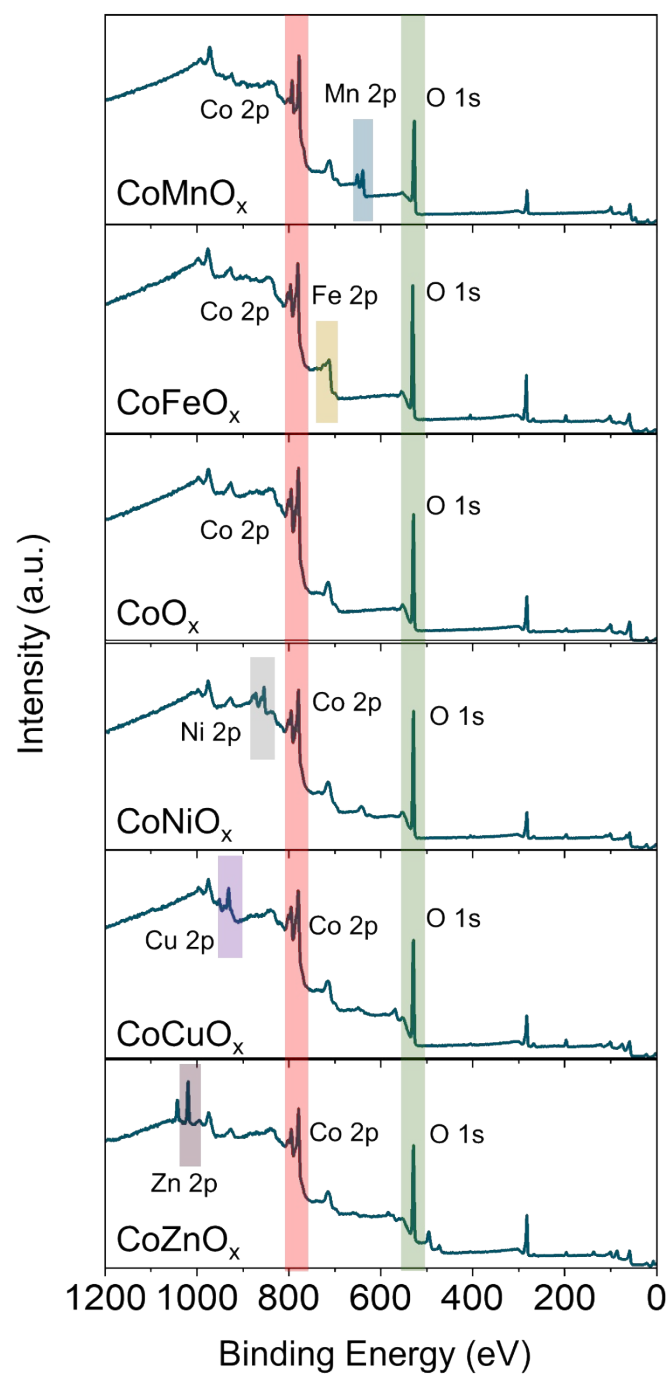

**Figure S6.** The XPS spectra of CoMO<sub>x</sub> (M=Mn, Fe, Co, Ni, Cu and Zn).

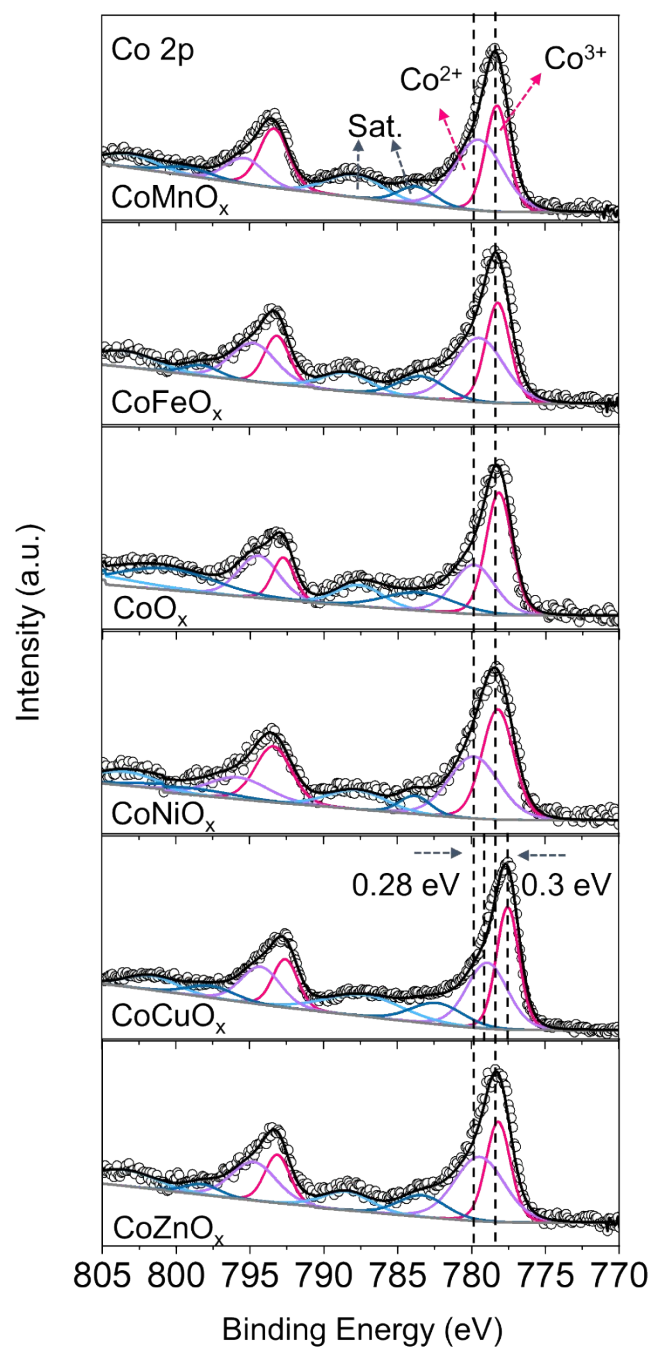

**Figure S7.** The Co 2p XPS spectra of CoMO<sub>x</sub> (M=Mn, Fe, Co, Ni, Cu and Zn).

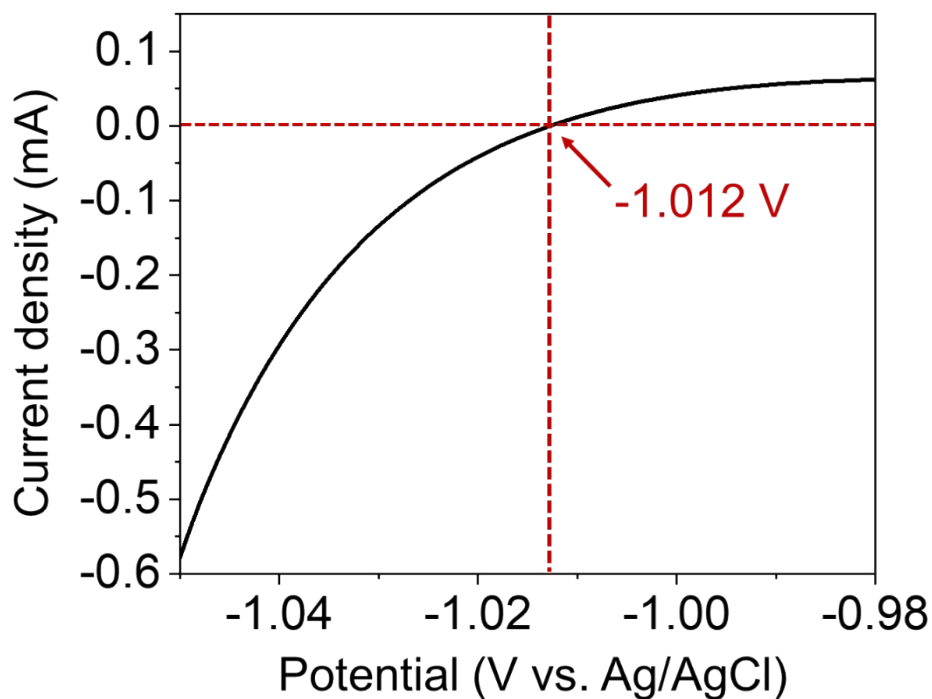

**Figure S8.** Calibration of the saturated Ag/AgCl electrode converted to reverse hydrogen electrode (RHE). Current-potential curves of the Pt in highly pure H<sub>2</sub>-saturated 1.0 M KOH solution with scan rate of 1 mV·s<sup>-1</sup>. Electrocatalytic OER/HMFOR activity of CoMO<sub>x</sub> (M= Mn, Fe, Co, Ni, Cu and Zn), and all the measured polarization curves in this work were converted to reverse hydrogen electrodes (RHE).<sup>[4]</sup>

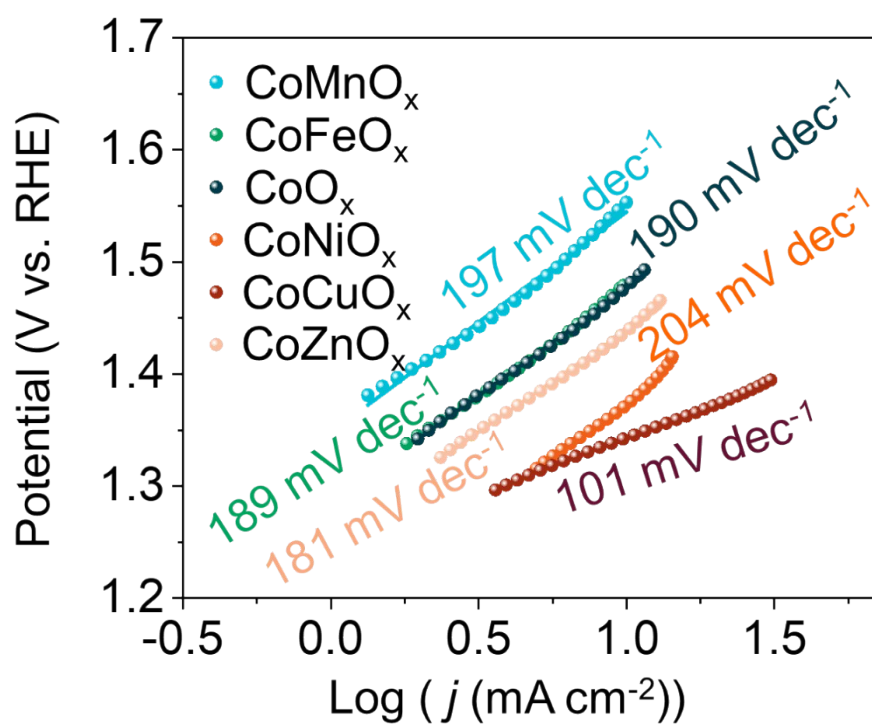

**Figure S9.** The tafel data of CoMO<sub>x</sub> (M=Mn, Fe, Co, Ni, Cu and Zn) for HMFOR.

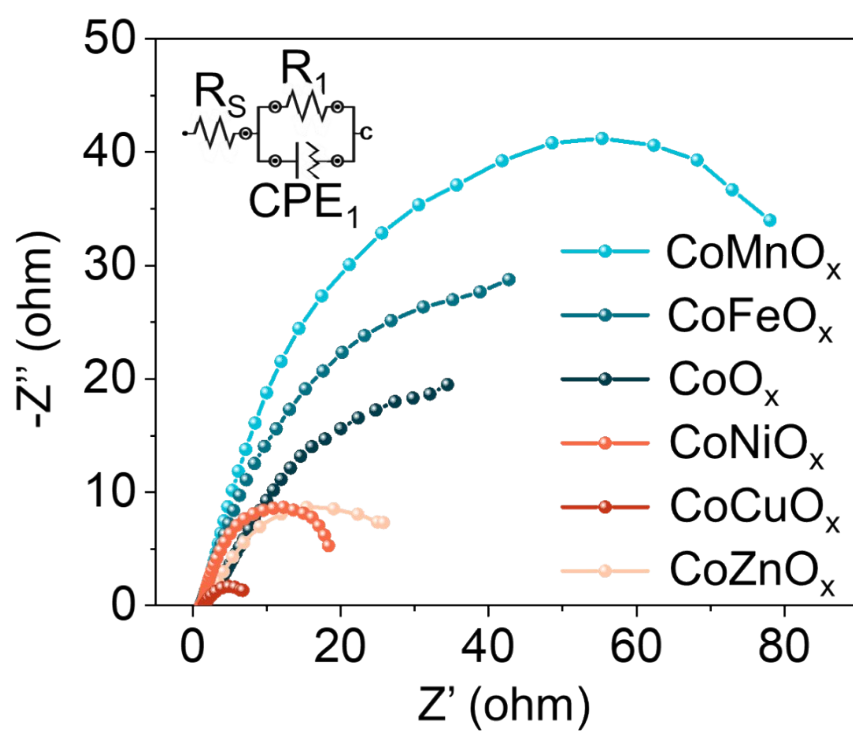

**Figure S10.** Nyquist plots of  $\text{CoMO}_x$  ( $M=\text{Mn, Fe, Co, Ni, Cu}$  and  $\text{Zn}$ ) for HMFOR.

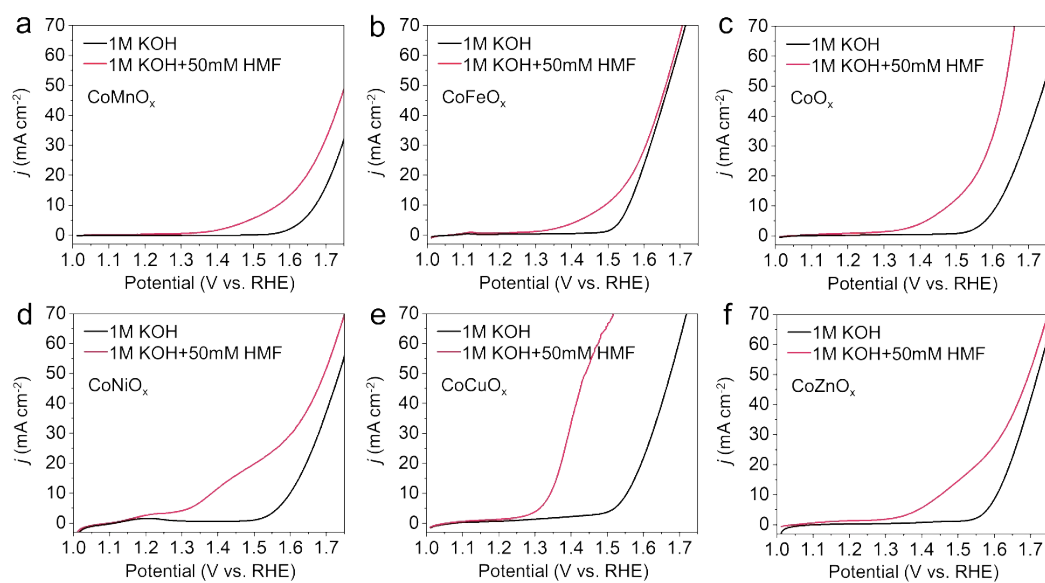

**Figure S11.** The LSV plots of HMFOR on CoMO<sub>x</sub> (M=Mn, Fe, Co, Ni, Cu and Zn).

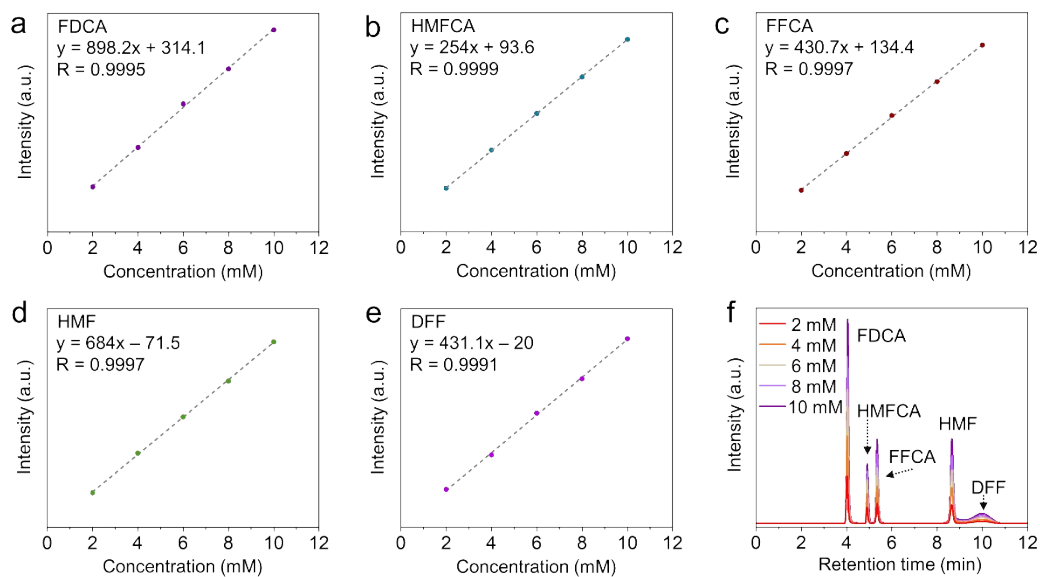

**Figure S12.** HPLC standard curve measurements of a) FDCA; b) HMFCFA; c) FFCA; d) HMF; e) DFF; f) The HPLC traces of the products at different concentrations.

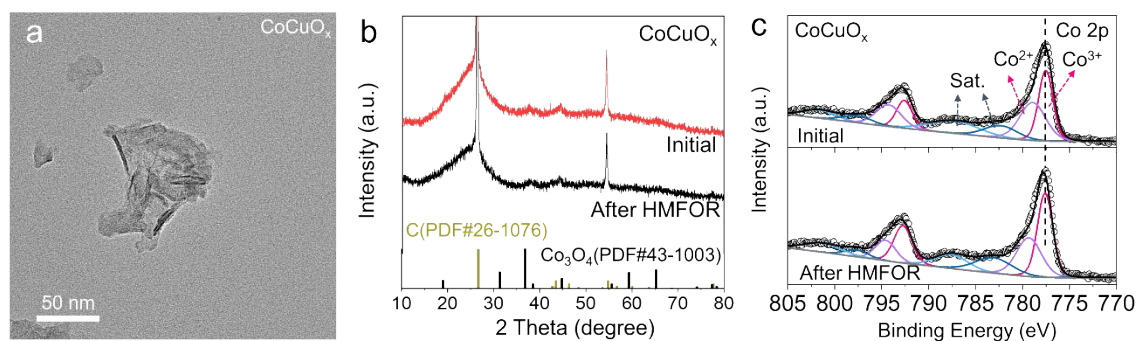

**Figure S13.** Structural characterization of  $\text{CoCuO}_x$  after HMFOR. a) HR-TEM of  $\text{CoCuO}_x$  after HMFOR; b) XRD spectra; c) The Co 2p XPS spectra.

As shown in Figure S13a, the lamellar structure can be observed from the HR-TEM image. Combined with the XRD spectrum, it was evident that the crystal structure of  $\text{CoCuO}_x$  remained intact before and after the reaction. (Figure S13b). The X-ray photoelectron spectroscopy (XPS) spectra in Figure S13c revealed that the Co binding energies of  $\text{CoCuO}_x$  were virtually identical, indicating the stability of the valence state of Co before and after the HMFOR reaction. To summarize, the characterization proved the excellent stability of  $\text{CoCuO}_x$  for HMFOR.

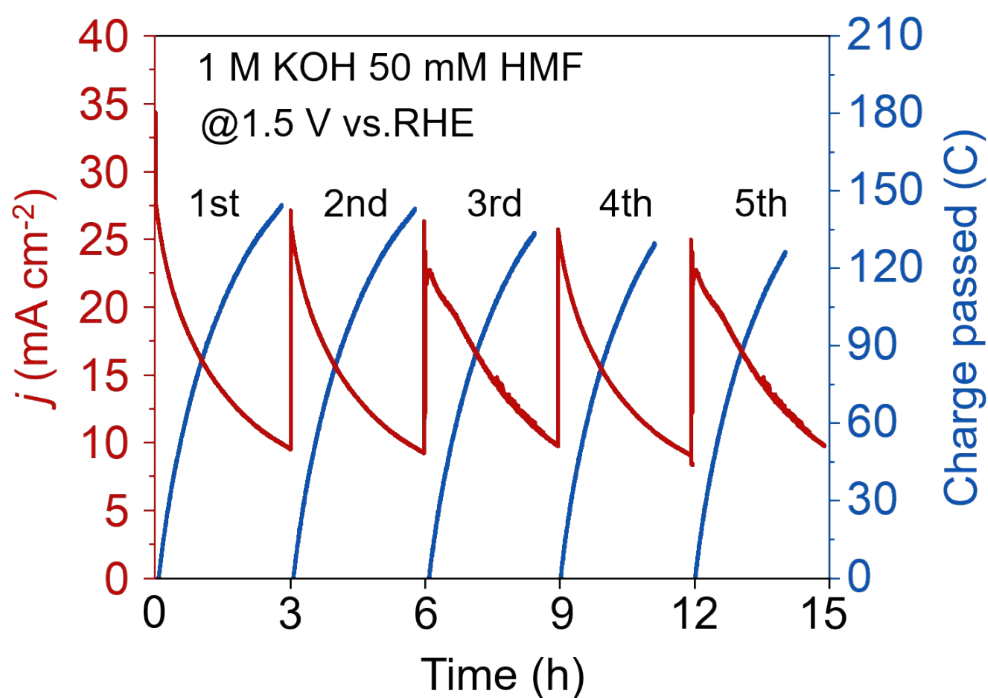

**Figure S14.** Current densities and charge-time during the HMFOR

As shown in Figure S14, the current density for the HMFOR declined slowly with time because of the consumption of HMF in the electrolyte. After 3 h of the HMFOR, the electrolyte was replaced by a fresh solution (1 M KOH + 50 mM HMF). We found that the starting current density was essentially the same in the following HMFOR cycles, which implied that the CoCuO<sub>x</sub> electrode still had high electrochemical activity during long-term HMFOR.

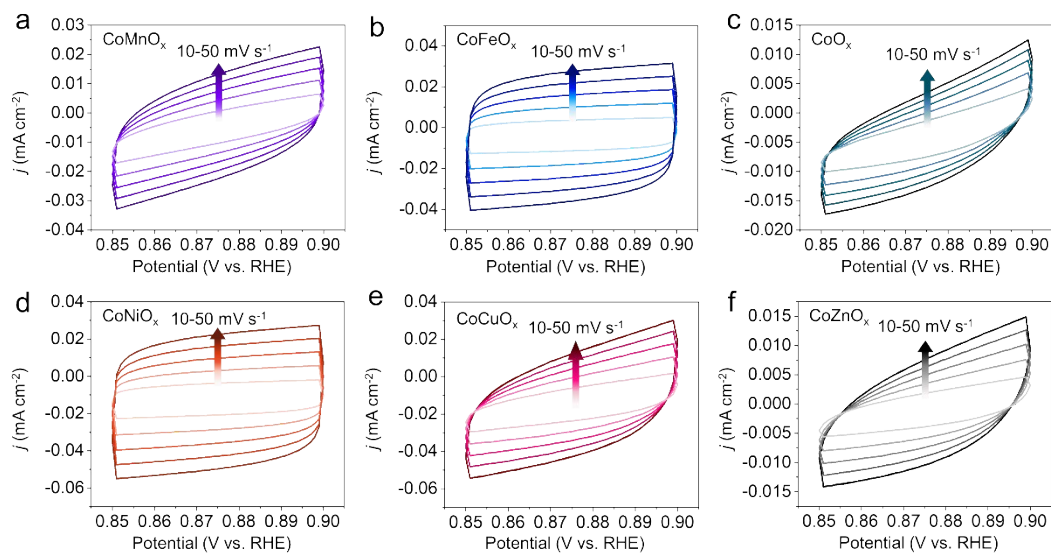

**Figure S15.**  $C_{dl}$  of  $CoMO_x$  ( $M=Mn, Fe, Co, Ni, Cu$  and  $Zn$ ) measured by CVs in 1 M

KOH with scan rate of 10 to 50  $mV s^{-1}$ .

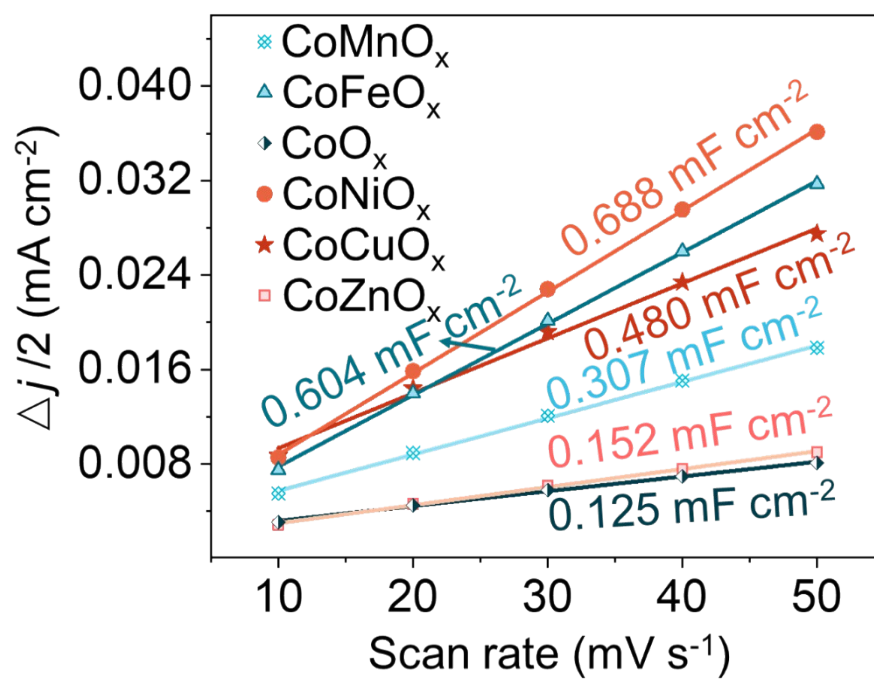

**Figure S16.** Double-layer charging current plotted against the CV scan rate for  $\text{CoMO}_x$

(M=Mn, Fe, Co, Ni, Cu and Zn).

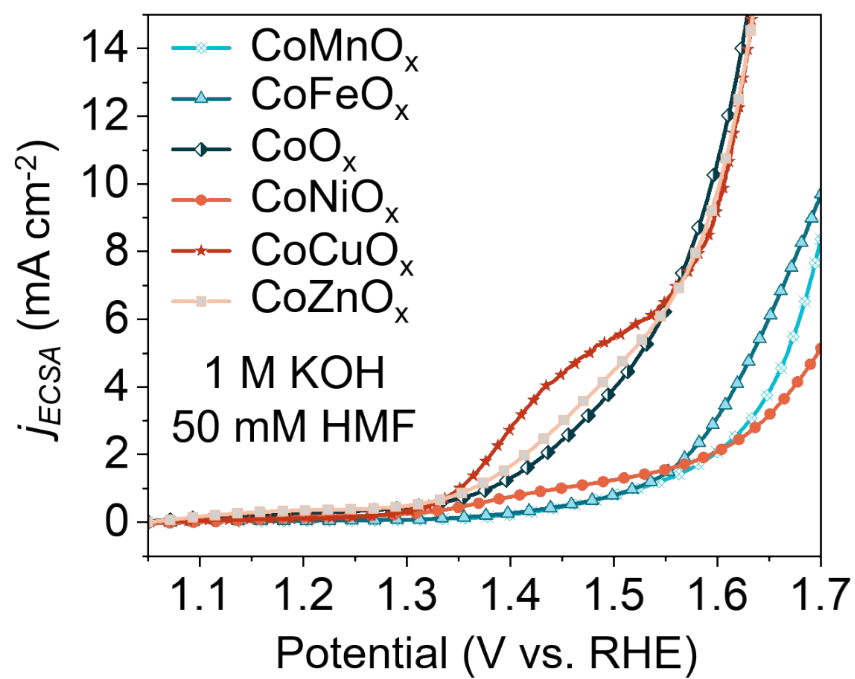

**Figure S17.** LSV curves with normalization by ECSA of CoMOx in 1 M KOH and 50 mM HMF.

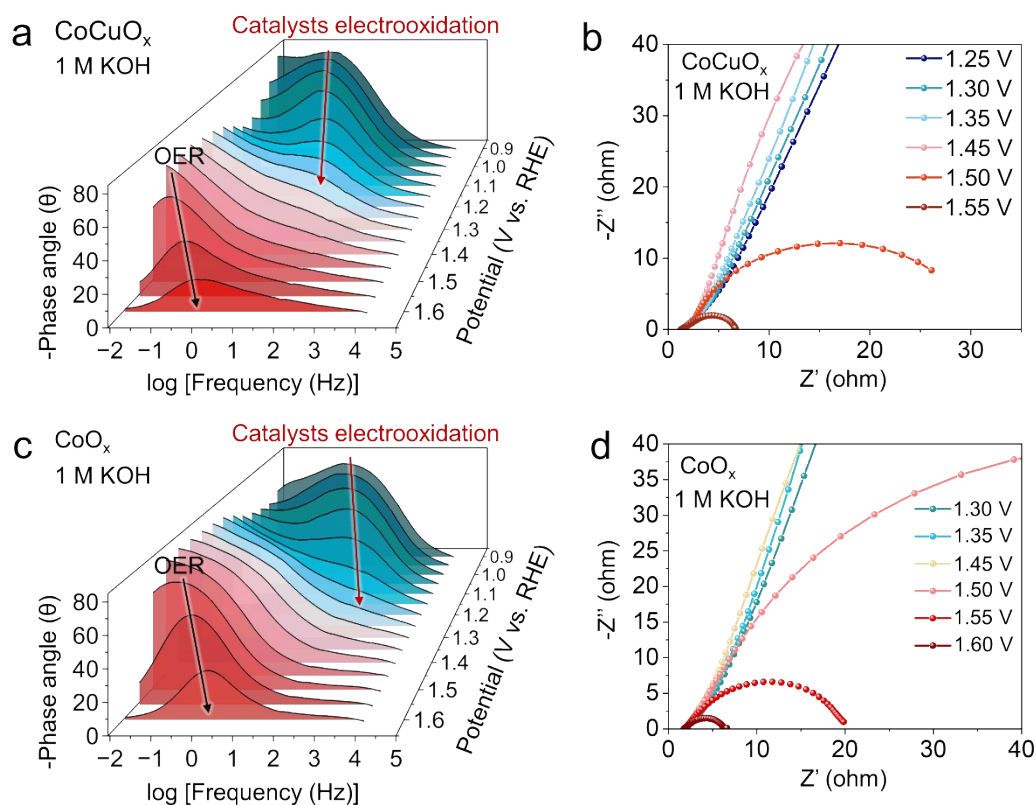

**Figure S18.** a) Bode plots and b) Nyquist plots of  $\text{CoCuO}_x$  for OER in different potentials; c) Bode plots and d) Nyquist plots of  $\text{CoO}_x$  for OER in different potentials.

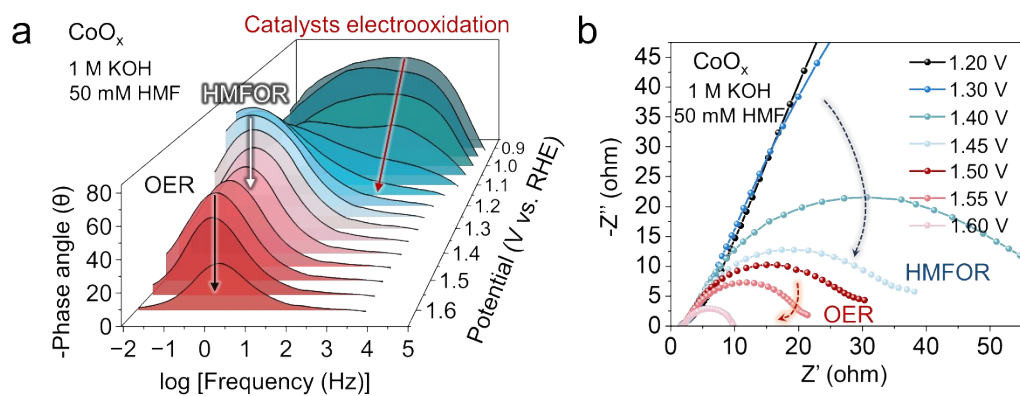

**Figure S19.** a) Bode plots and b) Nyquist plots of  $\text{CoO}_x$  for HMFOR in different potentials.

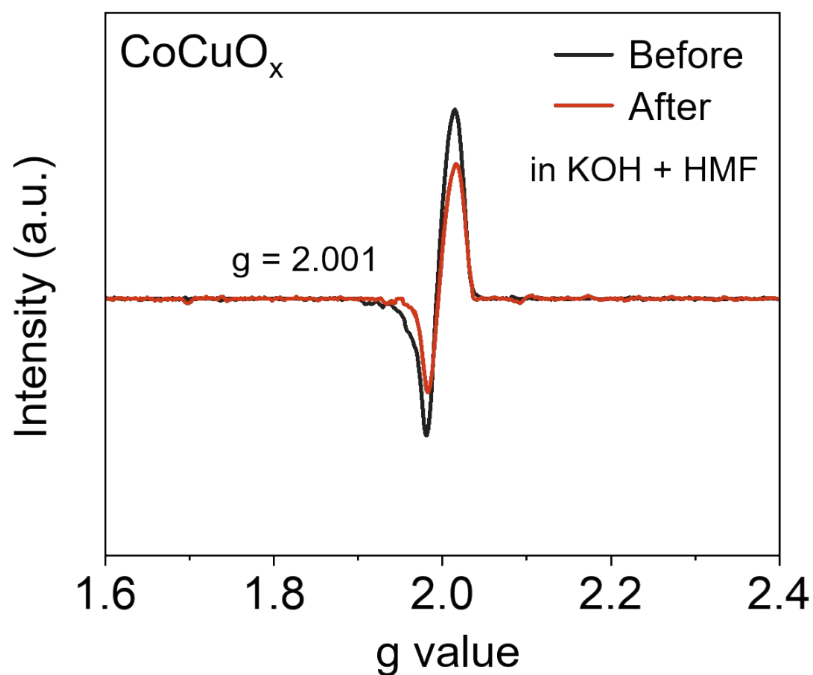

**Figure S20.** EPR spectra of  $\text{CoCuO}_x$  before and after voltage application in 1 M KOH and 50 mM HMF.

As shown in Figure S20, a representative EPR signal at  $g = 2.001$  was found in  $\text{CoCuO}_x$  before and after voltage application in 1 M KOH and 50 mM HMF, revealing the electron trapped by oxygen vacancies. The decrease in intensity indicated a reduction in oxygen vacancies, with nucleophilic  $\text{OH}^-$  occupying the oxygen vacancies in  $\text{CoCuO}_x$  and further participating in HMFOR.

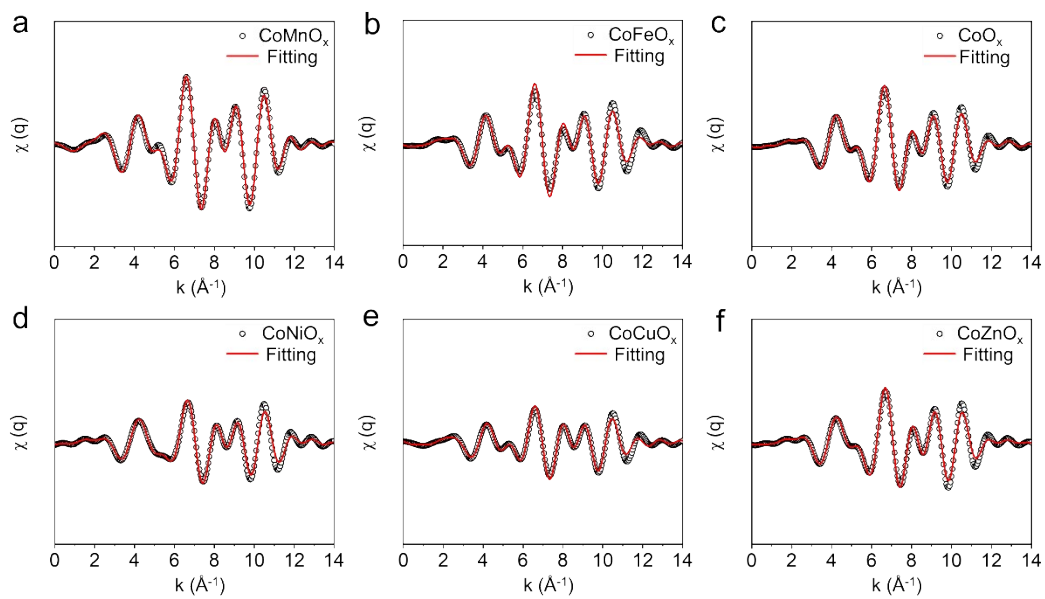

**Figure S21.** Co K-edge EXAFS fitting results for  $\text{CoMO}_x$  ( $M=\text{Mn, Fe, Co, Ni, Cu}$  and  $\text{Zn}$ ) (k-space).

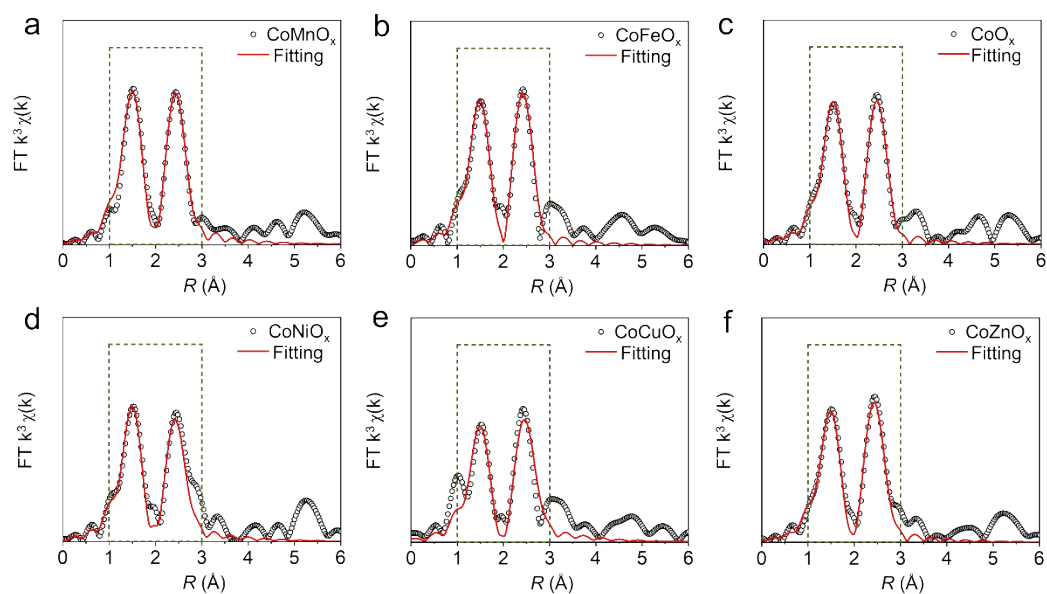

**Figure S22.** Co K-edge EXAFS fitting results for  $\text{CoMO}_x$  ( $M=\text{Mn, Fe, Co, Ni, Cu}$  and  $\text{Zn}$ ) (R-space).

**Table S1.** ICP quantitative analysis of CoO<sub>x</sub> doped with different metal elements.

| CoMO <sub>x</sub>  | M/Co molar ratio | Doped elements<br>(wt.%) |
|--------------------|------------------|--------------------------|
| CoMnO <sub>x</sub> | 0.282            | 10.10 (Mn)               |
| CoFeO <sub>x</sub> | 0.302            | 9.28 (Fe)                |
| CoO <sub>x</sub>   | /                | /                        |
| CoNiO <sub>x</sub> | 0.302            | 7.58 (Ni)                |
| CoCuO <sub>x</sub> | 0.313            | 9.90 (Cu)                |
| CoZnO <sub>x</sub> | 0.286            | 8.92 (Zn)                |

**Table S2.** HMFOR performance of CoCuO<sub>x</sub> and other reported catalysts.

| Electrocatalyst                                               | HMF(mM) | *Onset potential (V) | E <sub>j10</sub> (V) | Ref.                                      |
|---------------------------------------------------------------|---------|----------------------|----------------------|-------------------------------------------|
| CoCuO <sub>x</sub>                                            | 50      | 1.20                 | 1.34                 | This work                                 |
| NiCoFe LDH                                                    | 50      | 1.32                 | >1.40                | ACS Catal. 2020, 10, 5179                 |
| V <sub>2</sub> O <sub>5</sub> -Co <sub>3</sub> O <sub>4</sub> | 50      | 1.32                 | 1.35                 | Adv. Mater. 2022, 34, 2107185             |
| d-NiFe LDH/CP                                                 | 10      | 1.42                 | >1.45                | ACS Sustainable Chem. Eng. 2022, 10, 645  |
| NiB <sub>x</sub> -P <sub>0.07</sub>                           | 10      | 1.49                 | >1.65                | Ind. Eng. Chem. Res. 2020, 59, 17348.     |
| CoFe@NiFe LDH                                                 | 10      | 1.28                 | 1.31                 | Adv. Funct. Mater. 2021, 31, 2102886      |
| Ni <sub>3</sub> N/C                                           | 10      | 1.30                 | >1.35                | Angew. Chem. Int. Ed. 2019, 58, 15895     |
| PdO-CuO                                                       | 50      | 1.22                 | >1.35                | Adv. Mater. 2022, 34, 2204089             |
| hcp-Ni                                                        | 10      | >1.30                | >1.40                | Angew. Chem. Int. Ed. 2020, 59, 15487     |
| NiCo <sub>2</sub> O <sub>4</sub>                              | 5       | >1.25                | >1.40                | Appl. Catal. B- Environ. 2019, 242,85.    |
| Ni <sub>2</sub> S <sub>3</sub>                                | 10      | >1.30                | >1.35                | J. Am. Chem. Soc. 2016, 138, 13639.       |
| Pt (11.9 wt.%)/Ni(OH) <sub>2</sub>                            | 50      | >1.30                | >1.35                | Angew. Chem. Int. Ed 2021, 60, 22908      |
| Ir (7.97 wt%)/Co <sub>3</sub> O <sub>4</sub>                  | 50      | 1.20                 | >1.35                | Adv. Mater. 2021, 33, 2007056             |
| P-HEOs                                                        | 50      | >1.30                | >1.50                | Angew. Chem. Int. Ed. 2021, 60, 20253     |
| Ni(NS)/CP                                                     | 5       | >1.25                | >1.40                | Angew. Chem. Int. Ed. 2021, 60, 14528     |
| 3%Co-NiO/CC                                                   | 10      | 1.25                 | 1.35                 | Chem. Eng. J. 2022, 433,133842            |
| Cr-Ni(OH) <sub>2</sub> /NF                                    | 10      | >1.30                | >1.35                | Appl. Catal. B Environ. 2023, 330, 122590 |
| 1.2% Cr-Co-P                                                  | 10      | >1.25                | >1.40                | Green Chem., 2023, 25, 8196-8206          |

NOTE: \*Onset potential defined here as the HMFOR potential at a current density of 2 mA cm<sup>-2</sup>. All the potentials in the table are converted into the reversible hydrogen electrode (RHE).

**Table S3.** The resistance of each component for CoMO<sub>x</sub> (M=Mn, Fe, Co, Ni, Cu and Zn) in 1 M KOH and 50 mM HMF.

| CoMO <sub>x</sub>  | R <sub>s</sub> (Ω) | R <sub>1</sub> (Ω) | CPE <sub>1-T</sub><br>(S·s <sup>n</sup> ·cm <sup>-2</sup> ) | CPE <sub>1-P</sub> |
|--------------------|--------------------|--------------------|-------------------------------------------------------------|--------------------|
| CoMnO <sub>x</sub> | 1.438              | 111.1              | 0.006532                                                    | 0.81544            |
| CoFeO <sub>x</sub> | 1.103              | 85.12              | 0.014559                                                    | 0.74955            |
| CoO <sub>x</sub>   | 1.882              | 65.12              | 0.022118                                                    | 0.64923            |
| CoNiO <sub>x</sub> | 1.145              | 23.05              | 0.020674                                                    | 0.80477            |
| CoCuO <sub>x</sub> | 1.547              | 6.557              | 0.05868                                                     | 0.60269            |
| CoZnO <sub>x</sub> | 1.46               | 34.8               | 0.053756                                                    | 0.59102            |

Note: n=CPE-P.

**Table S4.** The resistance of each component for CoCuO<sub>x</sub> in 1 M KOH.

| Potential<br>(V) | R <sub>s</sub><br>(Ω) | R <sub>1</sub><br>(Ω) | CPE <sub>1</sub> -T<br>(S·s <sup>n</sup> ·cm <sup>-2</sup> ) | CPE <sub>1</sub> -<br>P | R <sub>2</sub><br>(Ω) | CPE <sub>2</sub> -T<br>(S·s <sup>n</sup> ·cm <sup>-2</sup> ) | CPE <sub>2</sub> -<br>P |
|------------------|-----------------------|-----------------------|--------------------------------------------------------------|-------------------------|-----------------------|--------------------------------------------------------------|-------------------------|
| 0.9              | 1.949                 | 48891                 | 0.003786                                                     | 0.87112                 |                       |                                                              |                         |
| 0.95             | 1.815                 | 10344                 | 0.004076                                                     | 0.80675                 |                       |                                                              |                         |
| 1                | 1.678                 | 6916                  | 0.004994                                                     | 0.69985                 |                       |                                                              |                         |
| 1.05             | 1.531                 | 3991                  | 0.009052                                                     | 0.58077                 |                       |                                                              |                         |
| 1.1              | 1.813                 | 50.23                 | 0.013037                                                     | 0.72922                 | 8755                  | 0.030876                                                     | 0.63943                 |
| 1.15             | 1.801                 | 48.02                 | 0.019953                                                     | 0.59515                 | 7831                  | 0.065503                                                     | 0.75859                 |
| 1.2              | 1.786                 | 44.53                 | 0.02692                                                      | 0.54906                 | 6798                  | 0.075238                                                     | 0.81456                 |
| 1.25             | 1.785                 | 40.57                 | 0.033373                                                     | 0.52413                 | 5963                  | 0.078647                                                     | 0.84338                 |
| 1.3              | 1.81                  | 34.52                 | 0.046755                                                     | 0.44995                 | 5102                  | 0.082821                                                     | 0.84332                 |
| 1.35             | 1.777                 | 30.81                 | 0.058554                                                     | 0.46337                 | 4012                  | 0.11982                                                      | 0.88564                 |
| 1.4              | 1.776                 | 24.63                 | 0.086769                                                     | 0.42443                 | 3021                  | 0.18315                                                      | 0.89934                 |
| 1.45             | 1.78                  | 19.53                 | 0.12943                                                      | 0.38846                 | 2513                  | 0.23126                                                      | 0.89093                 |
| 1.5              | 1.834                 | 4.632                 | 0.093561                                                     | 0.47249                 | 120                   | 0.17911                                                      | 0.84521                 |
| 1.55             | 1.82                  | 3.569                 | 0.090118                                                     | 0.4764                  | 16.54                 | 0.1525                                                       | 0.85307                 |
| 1.6              | 1.85                  | 0.81481               | 0.021848                                                     | 0.67523                 | 6.057                 | 0.081441                                                     | 0.70917                 |

Note: n=CPE-P.

**Table S5.** The resistance of each component for CoCuO<sub>x</sub> in 1 M KOH with 50 mM

HMF.

| Potential<br>(V) | R <sub>s</sub><br>(Ω) | R <sub>1</sub><br>(Ω) | CPE <sub>1</sub> -T<br>(S·s <sup>n</sup> ·cm <sup>-2</sup> ) | CPE <sub>1</sub> -<br>P | R <sub>2</sub><br>(Ω) | CPE <sub>2</sub> -T<br>(S·s <sup>n</sup> ·cm <sup>-2</sup> ) | CPE <sub>2</sub> -<br>P |
|------------------|-----------------------|-----------------------|--------------------------------------------------------------|-------------------------|-----------------------|--------------------------------------------------------------|-------------------------|
| 0.9              | 1.131                 | 11023                 | 0.000828                                                     | 0.68597                 |                       |                                                              |                         |
| 0.95             | 1.208                 | 7970                  | 0.001106                                                     | 0.67477                 |                       |                                                              |                         |
| 1                | 1.053                 | 6405                  | 0.00252                                                      | 0.58626                 |                       |                                                              |                         |
| 1.05             | 1.293                 | 5758                  | 0.006005                                                     | 0.55944                 |                       |                                                              |                         |
| 1.1              | 1.496                 | 33.7                  | 0.28706                                                      | 0.43463                 | 2344                  | 0.012988                                                     | 0.5939                  |
| 1.15             | 1.511                 | 27.02                 | 0.819                                                        | 0.54982                 | 1902                  | 0.023363                                                     | 0.5737                  |
| 1.2              | 1.453                 | 23.16                 | 0.27865                                                      | 0.89526                 | 1244                  | 0.03285                                                      | 0.5337                  |
| 1.25             | 1.381                 | 21.98                 | 0.18245                                                      | 0.94347                 | 219.1                 | 0.043228                                                     | 0.48597                 |
| 1.3              | 1.432                 | 9.35                  | 0.894444                                                     | 0.92732                 | 48.23                 | 0.04845                                                      | 0.51923                 |
| 1.35             | 1.274                 | 8.96                  | 0.059705                                                     | 0.74942                 | 27.59                 | 0.2129                                                       | 0.29139                 |
| 1.4              | 1.474                 | 7.687                 | 0.063292                                                     | 0.63839                 | 25.94                 | 0.59677                                                      | 0.40168                 |
| 1.45             | 1.486                 | 7.121                 | 0.13102                                                      | 0.54777                 | 21.72                 | 0.26795                                                      | 0.6518                  |
| 1.5              | 1.435                 | 10.27                 | 0.48921                                                      | 0.9081                  | 52                    | 0.18093                                                      | 0.44513                 |
| 1.55             | 1.493                 | 3.336                 | 0.15483                                                      | 0.54443                 | 16.02                 | 0.18678                                                      | 0.80577                 |
| 1.6              | 1.458                 | 2.12                  | 0.25455                                                      | 0.83648                 | 6.206                 | 0.18966                                                      | 0.45183                 |

Note: n=CPE-P.

**Table S6.** The resistance of each component for CoO<sub>x</sub> in 1 M KOH.

| Potential<br>(V) | R <sub>s</sub><br>(Ω) | R <sub>1</sub><br>(Ω) | CPE <sub>1</sub> -T<br>(S·s <sup>n</sup> ·cm <sup>-2</sup> ) | CPE <sub>1</sub> -<br>P | R <sub>2</sub><br>(Ω) | CPE <sub>2</sub> -T<br>(S·s <sup>n</sup> ·cm <sup>-2</sup> ) | CPE <sub>2</sub> -<br>P |
|------------------|-----------------------|-----------------------|--------------------------------------------------------------|-------------------------|-----------------------|--------------------------------------------------------------|-------------------------|
| 0.9              | 1.137                 | 76372                 | 0.0025003                                                    | 0.71161                 |                       |                                                              |                         |
| 0.95             | 0.97272               | 53546                 | 0.0034068                                                    | 0.61475                 |                       |                                                              |                         |
| 1                | 1.042                 | 20299                 | 0.0044909                                                    | 0.60355                 |                       |                                                              |                         |
| 1.05             | 1.179                 | 9677                  | 0.0064392                                                    | 0.62951                 |                       |                                                              |                         |
| 1.1              | 1.183                 | 5223                  | 0.015333                                                     | 0.53846                 |                       |                                                              |                         |
| 1.15             | 0.7478                | 191.9                 | 0.050939                                                     | 0.31222                 | 18892                 | 0.05279                                                      | 0.848                   |
| 1.2              | 1.241                 | 176                   | 0.065301                                                     | 0.42577                 | 16213                 | 0.065775                                                     | 0.89849                 |
| 1.25             | 1.269                 | 154.5                 | 0.082016                                                     | 0.42706                 | 14279                 | 0.053794                                                     | 0.89375                 |
| 1.3              | 1.242                 | 139.7                 | 0.14323                                                      | 0.36649                 | 12896                 | 0.042533                                                     | 0.87028                 |
| 1.35             | 1.287                 | 127.9                 | 0.15082                                                      | 0.39977                 | 10697                 | 0.052228                                                     | 0.88607                 |
| 1.4              | 1.301                 | 112.3                 | 0.23285                                                      | 0.37716                 | 9923                  | 0.066014                                                     | 0.88715                 |
| 1.45             | 1.283                 | 102.8                 | 0.416.18                                                     | 0.31683                 | 8798                  | 0.08941                                                      | 0.88366                 |
| 1.5              | 1.336                 | 76.56                 | 0.40095                                                      | 0.39145                 | 408.3                 | 0.11211                                                      | 0.88068                 |
| 1.55             | 1.32                  | 35.23                 | 0.093002                                                     | 0.89727                 | 84.29                 | 0.43366                                                      | 0.36967                 |
| 1.6              | 1.306                 | 1.019                 | 0.31636                                                      | 0.36691                 | 5.034                 | 0.06427                                                      | 0.88087                 |

Note: n=CPE-P.

**Table S7.** The resistance of each component for CoO<sub>x</sub> in 1 M KOH with 50 mM

HMF.

| Potential<br>(V) | R <sub>s</sub><br>(Ω) | R <sub>1</sub><br>(Ω) | CPE <sub>1</sub> -T<br>(S·s <sup>n</sup> ·cm <sup>-2</sup> ) | CPE <sub>1</sub> -<br>P | R <sub>2</sub><br>(Ω) | CPE <sub>2</sub> -T<br>(S·s <sup>n</sup> ·cm <sup>-2</sup> ) | CPE <sub>2</sub> -<br>P |
|------------------|-----------------------|-----------------------|--------------------------------------------------------------|-------------------------|-----------------------|--------------------------------------------------------------|-------------------------|
| 0.9              | 1.619                 | 18276                 | 0.0028073                                                    | 0.86355                 |                       |                                                              |                         |
| 0.95             | 1.704                 | 14299                 | 0.0035766                                                    | 0.8176                  |                       |                                                              |                         |
| 1                | 1.631                 | 11328                 | 0.0042951                                                    | 0.76822                 |                       |                                                              |                         |
| 1.05             | 1.482                 | 9291                  | 0.0062796                                                    | 0.6522                  |                       |                                                              |                         |
| 1.1              | 1.355                 | 6221                  | 0.011151                                                     | 0.52752                 |                       |                                                              |                         |
| 1.15             | 1.705                 | 497                   | 0.2602                                                       | 0.808                   | 8958                  | 0.003004                                                     | 0.824                   |
| 1.2              | 1.432                 | 202.4                 | 0.036558                                                     | 0.4244                  | 7989                  | 0.049471                                                     | 0.784                   |
| 1.25             | 1.475                 | 106.3                 | 0.057194                                                     | 0.39841                 | 6534                  | 0.032694                                                     | 0.72017                 |
| 1.3              | 1.48                  | 93.09                 | 0.21719                                                      | 0.28035                 | 3099                  | 0.02524                                                      | 0.62825                 |
| 1.35             | 1.589                 | 21.37                 | 0.044438                                                     | 0.4648                  | 291                   | 0.035663                                                     | 0.79981                 |
| 1.4              | 1.576                 | 13.8                  | 0.060548                                                     | 0.42805                 | 95.38                 | 0.040877                                                     | 0.7744                  |
| 1.45             | 1.548                 | 12.567                | 0.10799                                                      | 0.3547                  | 67.17                 | 0.057095                                                     | 0.71233                 |
| 1.5              | 1.515                 | 13.7                  | 0.19129                                                      | 0.28342                 | 72                    | 0.064962                                                     | 0.66555                 |
| 1.55             | 1.593                 | 8.56                  | 0.074254                                                     | 0.40947                 | 38.09                 | 0.06904                                                      | 0.85659                 |
| 1.6              | 1.605                 | 6.86                  | 0.063996                                                     | 0.42883                 | 14.49                 | 0.059014                                                     | 0.84692                 |

Note: n=CPE-P.

**Table S8.** Co K-edge EXAFS fitting results for CoMO<sub>x</sub> (M=Mn, Fe, Co, Ni, Cu and Zn).

| Sample             | Shell | N    | R/Å  | $\sigma^2/(10^{-3}\text{Å}^2)$ | $\Delta E_0$ | R-factor |
|--------------------|-------|------|------|--------------------------------|--------------|----------|
| CoMnO <sub>x</sub> | Co-O  | 5.68 | 1.91 | 4.2                            | -2.9         | 0.013    |
|                    | Co-M  | 5.14 | 2.83 | 4.0                            | -5.1         |          |
| CoFeO <sub>x</sub> | Co-O  | 4.32 | 1.91 | 4.3                            | -2.2         | 0.019    |
|                    | Co-M  | 4.62 | 2.85 | 5.6                            | -1.8         |          |
| CoO <sub>x</sub>   | Co-O  | 4.11 | 1.91 | 4.3                            | 0.8          | 0.020    |
|                    | Co-M  | 4.31 | 2.84 | 7.0                            | -2.1         |          |
| CoNiO <sub>x</sub> | Co-O  | 3.61 | 1.91 | 4.2                            | -2.0         | 0.009    |
|                    | Co-M  | 3.14 | 2.80 | 4.4                            | -4.5         |          |
| CoCuO <sub>x</sub> | Co-O  | 3.12 | 1.92 | 4.9                            | -1.3         | 0.009    |
|                    | Co-M  | 2.92 | 2.83 | 5.7                            | -2.5         |          |
| CoZnO <sub>x</sub> | Co-O  | 3.85 | 1.90 | 4.4                            | -0.2         | 0.017    |
|                    | Co-M  | 4.22 | 2.81 | 6.9                            | -3.4         |          |

## Reference

- [1] Y. Sun, X. Li, T. Zhang, K. Xu, Y. Yang, G. Chen, C. Li and Y. Xie, Nitrogen-Doped Cobalt Diselenide with Cubic Phase Maintained for Enhanced Alkaline Hydrogen Evolution. *Angew. Chem. Int. Ed.* **2021**, *60*, 21575-21582.
- [2] G. Liu, T. Nie, H. Wang, T. Shen, X. Sun, S. Bai, L. Zheng and Y.-F. Song, Size Sensitivity of Supported Palladium Species on Layered Double Hydroxides for the Electro-oxidation Dehydrogenation of Hydrazine: From Nanoparticles to Nanoclusters and Single Atoms. *ACS Catal.* **2022**, *12*, 10711-10717.
- [3] R. Zhong, P. Wu, Q. Wang, X. Zhang, L. Du, Y. Liu, H. Yang, M. Gu, Z. C. Zhang, L. Huang and S. Ye, Room-Temperature Fabrication of Defective  $\text{CoO}_x\text{H}_y$  Nanosheets with Abundant Oxygen Vacancies and High Porosity as Efficient 5-Hydroxymethylfurfural Oxidation Electrocatalyst. *Green Chem.* **2023**, *25*, 4674-4684.
- [4] H. Sun, C.-W. Tung, Y. Qiu, W. Zhang, Q. Wang, Z. Li, J. Tang, H.-C. Chen, C. Wang and H. M. Chen, Atomic Metal-Support Interaction Enables Reconstruction-Free Dual-Site Electrocatalyst. *J. Am. Chem. Soc.* **2022**, *144*, 1174-1186.
